# Supplementary material
Source: MDPI journal article supplement (https://www.mdpi.com/2071-1050/15/15/12072)
Supplement: s1 [file s1]

---

**Comparison of multiple macroalgae cultivation systems and end-use strategies of *Saccharina latissima* and *Gracilaria tikvahiae* based upon techno-economic analysis and life cycle assessment**

Jingjing Wu<sup>1</sup>, Shane W. Rogers<sup>1\*</sup>, Rebekah Schaumann<sup>1</sup>, Nichole N. Price<sup>2</sup>

<sup>1</sup>Department of Civil and Environmental Engineering, Clarkson University, 8 Clarkson Ave, Potsdam, NY 13699-5710

<sup>2</sup>Bigelow Laboratory for Ocean Sciences, East Boothbay, ME 04544-0380

\*Correspondence: [srogers@clarkson.edu](mailto:srogers@clarkson.edu)

---

Table S1 Biomass production and characteristics of *S. latissima* and *G. tikvahiae* as reported in literature; median of fresh biomass was calculated based upon dry biomass and total solids [1–25]

| Parameter            | Unit                     | <i>S. latissima</i> |             | <i>G. tikvahiae</i> |               |
|----------------------|--------------------------|---------------------|-------------|---------------------|---------------|
|                      |                          | Median              | Range       | Median              | Range         |
| Biomass (fresh)      | ton/ha·year              | 37.35               | 17.5 - 75   | 11.89               | 11 - 26       |
| Biomass (dry)        | ton/ha·year              | 6.35                | 1.5 - 11.2  | 1.57                | 0.94 - 2.2    |
| Biomass              | kg-FW/m                  | 15.7                | 3.0 - 28.4  | n.a.                | n.a.          |
| Total solids         | g-DW/g-FW                | 0.17                | 0.10 - 0.23 | 0.13                | 0.10 - 0.16   |
| Volatile solids      | g-VS/g-DW                | 0.58                | 0.50 - 0.65 | 0.62                | 0.52 - 0.72   |
| Total carbon         | mg/g-DW                  | 302.5               | 251 - 354   | 282.7               | 275.0 - 290.4 |
| Total nitrogen       | mg/g-DW                  | 23.2                | 8.3 - 38    | 34.5                | 12.0 - 57     |
| Total phosphorus     | mg/g-DW                  | 3.9                 | 2.8 - 5     | 3.0                 | 1.0 - 5.0     |
| Moisture (dried)     | %                        | 22                  | -           | 22                  | -             |
| Biomethane potential | L CH <sub>4</sub> /kg-VS | 260.9               | 180 - 341.7 | 205                 | 190 - 220     |

Table S2 Cost inventories of *S. latissima* and *G. tikvahiae* cultivation based upon a one-hectare sea farm (costs adjusted to 2020 U.S. dollars)

| Cost category          | Lifespan<br>(year) | Single layer longline |                     | Dual layer longline |                     | Single layer strip  |                     | Dual layer strip (S4) |                     |
|------------------------|--------------------|-----------------------|---------------------|---------------------|---------------------|---------------------|---------------------|-----------------------|---------------------|
|                        |                    | (S1)                  |                     | (S2)                |                     | (S3)                |                     |                       |                     |
|                        |                    | <i>S. latissima</i>   | <i>G. tikvahiae</i> | <i>S. latissima</i> | <i>G. tikvahiae</i> | <i>S. latissima</i> | <i>G. tikvahiae</i> | <i>S. latissima</i>   | <i>G. tikvahiae</i> |
| Spool                  | 25                 | \$47.91               | N.A.                | \$95.82             | N.A.                | \$115.50            | N.A.                | \$230.15              | N.A.                |
| Settling tube          | 25                 | \$123.96              | N.A.                | \$247.93            | N.A.                | \$298.84            | N.A.                | \$595.47              | N.A.                |
| Settling tube cap      | 25                 | \$129.92              | N.A.                | \$259.84            | N.A.                | \$313.20            | N.A.                | \$624.08              | N.A.                |
| PVC primer and glue    | 1                  | \$9.94                | N.A.                | \$9.94              | N.A.                | \$9.94              | N.A.                | \$9.94                | N.A.                |
| Seeding line           | 1                  | \$82.12               | \$82.12             | \$164.25            | \$164.25            | \$197.98            | \$197.98            | \$394.49              | \$394.49            |
| Nursery Electricity    | 1                  | \$18.21               | \$18.21             | \$36.42             | \$36.42             | \$42.53             | \$42.53             | \$82.12               | \$82.12             |
| F/2 media              | 1                  | \$13.66               | \$13.66             | \$27.31             | \$27.31             | \$32.92             | \$32.92             | \$65.60               | \$65.60             |
| Spoon Labor            | 1                  | \$180.00              | \$180.00            | \$330.00            | \$330.00            | \$420.00            | \$420.00            | \$810.00              | \$810.00            |
|                        |                    | \$75,000.             |                     | \$75,000.           |                     | \$75,000.           |                     | \$75,000.             |                     |
| Barge                  | 25                 | 00                    | N.A.                | 00                  | N.A.                | 00                  | N.A.                | 00                    | N.A.                |
|                        |                    | \$2,250.0             |                     | \$2,250.0           |                     | \$2,700.0           |                     | \$2,700.0             |                     |
| Anchor block           | 25                 | 0                     | N.A.                | 0                   | N.A.                | 0                   | N.A.                | 0                     | N.A.                |
|                        |                    | \$54,417.             |                     | \$54,417.           |                     | \$65,301.           |                     | \$65,301.             |                     |
| Anchor chain           | 25                 | 82                    | N.A.                | 82                  | N.A.                | 39                  | N.A.                | 39                    | N.A.                |
|                        |                    | \$7,499.7             |                     | \$7,499.7           |                     | \$8,999.6           |                     | \$8,999.6             |                     |
| Anchor buoy            | 25                 | 0                     | N.A.                | 0                   | N.A.                | 4                   | N.A.                | 4                     | N.A.                |
|                        |                    | \$5,748.6             |                     | \$11,497.           |                     | \$13,858.           |                     | \$27,614.             |                     |
| Longline               | 5                  | 8                     | N.A.                | 36                  | N.A.                | 43                  | N.A.                | 20                    | N.A.                |
|                        |                    | \$5,748.6             |                     | \$5,748.6           |                     | \$13,858.           |                     | \$13,807.             |                     |
| Control line           | 5                  | 8                     | N.A.                | 8                   | N.A.                | 43                  | N.A.                | 10                    | N.A.                |
|                        |                    | \$6,295.0             |                     | \$6,295.0           |                     | \$7,554.0           |                     | \$7,554.0             |                     |
| Small buoy             | 25                 | 0                     | N.A.                | 0                   | N.A.                | 0                   | N.A.                | 0                     | N.A.                |
| Buoy maintenance       | 1                  | \$137.95              | \$137.95            | \$137.95            | \$137.95            | \$165.54            | \$165.54            | \$165.54              | \$165.54            |
|                        |                    |                       |                     | \$1,426.0           |                     | \$1,141.4           |                     | \$3,424.3             |                     |
| Drop line              | 5                  | \$475.60              | N.A.                | 0                   | N.A.                | 4                   | N.A.                | 2                     | N.A.                |
| Drop line              |                    |                       |                     |                     |                     |                     |                     | \$2,190.3             |                     |
| Drop line strengthener | 25                 | \$304.22              | N.A.                | \$912.66            | N.A.                | \$730.13            | N.A.                | 8                     | N.A.                |
|                        |                    |                       |                     |                     |                     |                     |                     | \$1,800.0             |                     |
| Line weight            | 25                 | \$375.00              | N.A.                | \$750.00            | N.A.                | \$900.00            | N.A.                | 0                     | N.A.                |
|                        |                    |                       |                     |                     |                     | \$1,259.5           |                     | \$1,259.5             |                     |
| Strip strengthener     | 25                 | N.A.                  | N.A.                | N.A.                | N.A.                | 2                   | N.A.                | 2                     | N.A.                |
|                        |                    | \$4,743.4             |                     | \$4,973.9           |                     | \$5,701.3           |                     | \$6,289.5             |                     |
| Insurance              | 1                  | 4                     | N.A.                | 4                   | N.A.                | 0                   | N.A.                | 2                     | N.A.                |
|                        |                    | \$3,750.0             |                     | \$3,750.0           |                     | \$3,750.0           |                     | \$3,750.0             |                     |
| Boat maintenance       | 1                  | 0                     | N.A.                | 0                   | N.A.                | 0                   | N.A.                | 0                     | N.A.                |
|                        |                    | \$3,466.0             | \$3,466.0           | \$3,850.1           | \$3,850.1           | \$4,924.4           | \$4,924.4           | \$5,904.8             | \$5,904.8           |
| Other maintenance      | 1                  | 0                     | 0                   | 7                   | 7                   | 9                   | 9                   | 5                     | 5                   |

|                       |    |           |           |           |           |           |           |           |           |
|-----------------------|----|-----------|-----------|-----------|-----------|-----------|-----------|-----------|-----------|
|                       |    | \$1,190.0 |           | \$1,190.0 |           | \$1,190.0 |           | \$1,190.0 |           |
| Bucket                | 5  | 0         | N.A.      | 0         | N.A.      | 0         | N.A.      | 0         | N.A.      |
| Seaweed farm gasoline | 1  | \$293.87  | \$180.11  | \$407.62  | \$246.47  | \$530.85  | \$274.91  | \$748.88  | \$369.70  |
|                       |    | \$4,800.0 | \$1,680.0 | \$6,780.0 | \$2,460.0 | \$9,900.0 | \$3,180.0 | \$14,520. | \$4,680.0 |
| Seaweed farm labor    | 1  | 0         | 0         | 0         | 0         | 0         | 0         | 00        | 0         |
|                       |    | \$1,500.0 |           | \$1500.0  |           | \$1,500.0 |           | \$1,500.0 |           |
| Lease application     | 20 | 0         | N.A.      | 0         | N.A.      | 0         | N.A.      | 0         | N.A.      |

N.A.: not applicable, equipment for *S. latissima* cultivation was shared with *G. tikvahiae* cultivation

Table S3 Cost and economic value inventories of *S. latissima* and *G. tikvahiae* processing and end-use products for one-kilogram dry weight of harvested biomass (cost adjusted to 2020 U.S. dollars)

| Cost category                 | <i>S. Latissima</i> | <i>G. Tikvahiae</i> |
|-------------------------------|---------------------|---------------------|
| Transportation, fresh (80 km) | \$0.05              | \$0.07              |
| Transportation, dry (80 km)   | \$0.01              | \$0.01              |
| Dryer cost                    | \$0.55              | \$0.77              |
| Dryer labor cost              | \$0.09              | \$0.12              |
| Mill cost                     | \$0.003             | \$0.003             |
| Mill labor cost               | \$0.02              | \$0.02              |
| AD-electricity economic value | \$0.07              | \$0.06              |
| AD-digestate economic value   | \$0.06              | \$0.08              |
| Animal feed economic value    | \$0.85              | \$0.85              |
| Fertilizer economic value     | \$4.68              | \$4.68              |
| Human food economic value     | \$19.78             | \$19.78             |
| Dryer*                        | \$10,000.00         |                     |
| Hammermill*                   | \$3,000.00          |                     |

\*The capital cost of seaweed dryer and hammermill was not adjusted for 1 kg dry weight of seaweed. The purchase of one dryer and one hammermill was assumed for all scenarios in which the seaweed drying and grinding was required. The lifespan of the dryer and hammermill was assumed to be 10 years.

Table S4 Minimum, mode and maximum values of the triangle distribution applied to the parameters used in the Monte Carlo simulation of one-kilogram dry weight of *S. latissima* and *G. tikvahiae* cultivation and processing costs

|                                              | Unit | Min   | Mode | Max  | Applied scenario |
|----------------------------------------------|------|-------|------|------|------------------|
| Biomass solid content ( <i>S.latissima</i> ) | % FW | 10    | 17   | 23   | S1-S4            |
| Biomass/m of longline ( <i>S.latissima</i> ) | kg   | 3     | 15.7 | 28.4 | S1-S4            |
| Biomass solid content ( <i>G.tikvahiae</i> ) | % FW | 10    | 13   | 16   | S1-S4            |
| Biomass/m of longline ( <i>G.tikvahiae</i> ) | kg   | 2.92  | 4.87 | 6.82 | S1-S4            |
| Second/first layer biomass ratio             | -    | 0.5   | 0.5  | 1    | S2, S4           |
| Biomass solid content after drying           | %    | 5     | 5    | 22   | P2-P4            |
| Total length of longline (S1)                | m    | 1,860 | 2480 | 3100 | S1               |
| Total length of longline (S2)                | m    | 3,720 | 4960 | 6200 | S2               |
| Number of longlines                          | -    | 8     | 10   | 12   | S1, S2           |

|                                      |              |          |          |           |       |
|--------------------------------------|--------------|----------|----------|-----------|-------|
| Barge                                | -            | \$50,000 | \$75,000 | \$100,000 | S1-S4 |
| Anchor chain                         | per m        | \$53.72  | \$71.62  | \$89.53   | S1-S4 |
| Seawater depth (anchor chain length) | m            | 3.43     | 4.57     | 5.72      | S1-S4 |
| Longline/control line                | per m        | \$1.72   | \$2.30   | \$2.87    | S1-S4 |
| Seafarm labor wage                   | per h        | \$11.25  | \$15.00  | \$18.75   | S1-S4 |
| Seafarm labor time factor            | -            | 0.75     | 1        | 1.25      | S1-S4 |
| Transport distance                   | km           | 40       | 80       | 120       | P1    |
| Transport distance                   | km           | 40       | 80       | 1200      | P2-P4 |
| Dryer capacity                       | tonne/h      | 0.5      | 0.5      | 20        | P2-P4 |
| Dryer cost factor                    | -            | 0.9      | 1        | 1.1       | P2-P4 |
| Dryer labor requirement              | %drying time | 25       | 50       | 75        | P2-P4 |
| Mill capacity                        | tonne/h      | 0.5      | 1        | 10        | P3-P4 |
| Mill labor requirement               | %mill time   | 25       | 50       | 75        | P3-P4 |

FW: fresh weight;

Seafarm labor time factor was used to adjust the total labor time of the offshore seaweed farm; the dryer cost factor was used to adjust the energy cost of the seaweed drying. the factor equates to 1 indicated the value used in the techno-economic analysis

Table S5 Life cycle inventories of one-kilogram dry weight of *S. latissima* and *G. tikvahiae* cultivation through cultivation scenarios S1-S4.

| Phase/Process     | Material or Energy   | Unit | L | Single layer longline (S1) |                     | Dual layer longline (S2) |                     | Single layer strip (S3) |                     | Dual layer strip (S4) |                     |
|-------------------|----------------------|------|---|----------------------------|---------------------|--------------------------|---------------------|-------------------------|---------------------|-----------------------|---------------------|
|                   |                      |      |   | <i>S. latissima</i>        | <i>G. tikvahiae</i> | <i>S. latissima</i>      | <i>G. tikvahiae</i> | <i>S. latissima</i>     | <i>G. tikvahiae</i> | <i>S. latissima</i>   | <i>G. tikvahiae</i> |
|                   |                      |      |   |                            |                     |                          |                     |                         |                     |                       |                     |
|                   |                      |      |   | <i>a</i>                   |                     | <i>a</i>                 |                     | <i>a</i>                |                     | <i>a</i>              |                     |
| Hatchery phase    |                      |      |   |                            |                     |                          |                     |                         |                     |                       |                     |
| Spool             | PVC                  | kg   | 2 | 1.17E-04                   | 9.45E-05            | 1.56E-04                 | 6.53E-04            | 1.17E-04                | 9.45E-05            | 1.56E-04              | 1.26E-04            |
| Settling tube     | PVC                  | kg   | 2 | 3.43E-04                   | 2.77E-04            | 4.57E-04                 | 1.92E-03            | 3.43E-04                | 2.77E-04            | 4.57E-04              | 3.70E-04            |
| Settling tube cap | PVC                  | kg   | 2 | 4.87E-05                   | 3.93E-05            | 6.49E-05                 | 2.72E-04            | 4.87E-05                | 3.93E-05            | 6.49E-05              | 5.24E-05            |
| Seeding line      | Nylon                | kg   | 1 | 2.34E-04                   | 9.87E-04            | 3.12E-04                 | 1.32E-03            | 2.34E-04                | 9.87E-04            | 3.12E-04              | 1.32E-03            |
| Electricity       | Electricity          | kw h | 1 | 2.27E-02                   | 9.57E-02            | 3.03E-02                 | 1.28E-01            | 2.20E-02                | 9.28E-02            | 2.84E-02              | 1.20E-01            |
| F/2-organic       | Chemicals, organic   | g    | 1 | 1.01E-06                   | 4.24E-06            | 1.34E-06                 | 5.66E-06            | 1.01E-06                | 4.24E-06            | 1.34E-06              | 5.66E-06            |
| F/2-inorganic     | Chemicals, inorganic | g    | 1 | 3.55E-05                   | 1.50E-04            | 4.73E-05                 | 1.99E-04            | 3.55E-05                | 1.50E-04            | 4.73E-05              | 1.99E-04            |
| Sea site phase    |                      |      |   |                            |                     |                          |                     |                         |                     |                       |                     |
| Barge             | Aluminum             | kg   | 2 | 8.98E-03                   | 7.26E-03            | 5.99E-03                 | 2.51E-02            | 3.73E-03                | 3.01E-03            | 2.49E-03              | 2.01E-03            |

|                    |               |    |   |          |          |          |          |          |          |          |          |
|--------------------|---------------|----|---|----------|----------|----------|----------|----------|----------|----------|----------|
| Anchor block       | Concrete      | kg | 2 | 2.99E-01 | 2.42E-01 | 2.00E-01 | 8.36E-01 | 1.49E-01 | 1.20E-01 | 9.97E-02 | 8.06E-02 |
| Anchor chain       | Steel         | kg | 2 | 6.87E-02 | 5.55E-02 | 4.58E-02 | 1.92E-01 | 3.42E-02 | 2.76E-02 | 2.29E-02 | 1.85E-02 |
| Anchor buoy        | Polyethylene  | kg | 2 | 1.58E-03 | 1.28E-03 | 1.05E-03 | 4.41E-03 | 7.87E-04 | 6.36E-04 | 5.26E-04 | 4.26E-04 |
| Longline           | Polyester     | kg | 5 | 5.58E-03 | 4.51E-03 | 7.43E-03 | 3.11E-02 | 5.58E-03 | 4.51E-03 | 7.43E-03 | 6.01E-03 |
| Control line       | Polyester     | kg | 5 | 5.58E-03 | 4.51E-03 | 3.72E-03 | 1.56E-02 | 5.58E-03 | 4.51E-03 | 3.72E-03 | 3.00E-03 |
| Small buoy         | Vinyl-PVC     | kg | 2 | 1.56E-03 | 1.26E-03 | 1.04E-03 | 4.36E-03 | 7.77E-04 | 6.28E-04 | 5.20E-04 | 4.20E-04 |
| Drop line          | Polyester     | kg | 5 | 3.01E-04 | 2.43E-04 | 6.01E-04 | 2.52E-03 | 2.99E-04 | 2.42E-04 | 6.01E-04 | 4.86E-04 |
| 1" PVC             | PVC           | kg | 2 | 7.13E-04 | 5.76E-04 | 1.43E-03 | 5.97E-03 | 7.09E-04 | 5.73E-04 | 1.42E-03 | 1.15E-03 |
| Line weight        | Concrete      | kg | 2 | 6.79E-03 | 5.49E-03 | 9.05E-03 | 3.79E-02 | 6.76E-03 | 5.46E-03 | 9.05E-03 | 7.31E-03 |
| Strip strengthener | PVC           | kg | 2 | N.A.     | N.A.     | N.A.     | N.A.     | 1.15E-03 | 9.32E-04 | 7.71E-04 | 6.24E-04 |
| Bucket             | Polypropylene | kg | 5 | 5.87E-03 | 4.75E-03 | 3.92E-03 | 1.64E-02 | 2.44E-03 | 1.97E-03 | 1.63E-03 | 1.32E-03 |
| Seaweed farm       | Gasoline      | L  | 1 | 6.41E-02 | 1.65E-01 | 5.92E-02 | 1.51E-01 | 4.80E-02 | 1.05E-01 | 4.53E-02 | 9.43E-02 |
| gasoline           |               |    |   |          |          |          |          |          |          |          |          |

N.A.: not applicable

LS: the lifespan of the item in year

Table S6 Life cycle inventories of one-kilogram dry weight of *S. latissima* and *G. tikvahiae* processing and end-use scenarios P1-P4.

| Scenario/Process             | Material or Energy               | Unit                              | <i>S. Latissima</i> | <i>G. Tikvahiae</i> |
|------------------------------|----------------------------------|-----------------------------------|---------------------|---------------------|
| P1 - Digestate               |                                  |                                   |                     |                     |
| Transportation, fresh weight | Transport, combination truck     | tkm                               | 0.47                | 0.62                |
| Substitution of electricity  | Electricity                      | kwh                               | 0.56                | 0.47                |
| Substitution of fertilizer   | Urea ammonium nitrate production | as gN                             | 23.2                | 34.5                |
| Substitution of fertilizer   | Diammonium phosphate             | as gP <sub>2</sub> O <sub>5</sub> | 3.9                 | 3.0                 |
| P2 - Human food              |                                  |                                   |                     |                     |
| Drying                       | Water evaporated                 | m <sup>3</sup>                    | 4.60E-03            | 6.41E-03            |
| Transportation, dry weight   | Transport, combination truck     | tkm                               | 0.10                | 0.10                |
| Substitution of lettuce      | Lettuce                          | kg                                | 5.88                | 7.69                |
| P3 - Seaweed fertilizer      |                                  |                                   |                     |                     |
| Drying                       | Water evaporated                 | m <sup>3</sup>                    | 4.60E-03            | 6.41E-03            |

|                            |                                  |                      |          |          |
|----------------------------|----------------------------------|----------------------|----------|----------|
| Mill                       | Crop grinded                     | kg                   | 1.28     | 1.28     |
| Transportation, dry weight | Transport, combination truck     | tkm                  | 0.10     | 0.10     |
| Substitution of fertilizer | Urea ammonium nitrate production | as gN                | 23.2     | 34.5     |
| Substitution of fertilizer | Diammonium phosphate             | as gP <sub>2</sub> O | 3.9      | 3.0      |
| P4 - Animal feed           |                                  |                      |          |          |
| Drying                     | Water evaporated                 | m <sup>3</sup>       | 4.60E-03 | 6.41E-03 |
| Mill                       | Crop grinded                     | kwh                  | 0.01     | 0.01     |
| Transportation, dry weight | Transport, combination truck     | tkm                  | 0.10     | 0.10     |
| Substitution of fishmeal   | Fishmeal                         | kg                   | 1.28     | 1.28     |

Table S7 Comparison of normalized amounts of each environmental impact of one-kilogram dry weight of *S. latissima* and *G. tikvahiae* cultivation through cultivation scenarios S1-S4.

|                                   | Construction |          | Operation           |                     |
|-----------------------------------|--------------|----------|---------------------|---------------------|
|                                   | C1           | C2       | <i>S. latissima</i> | <i>G. tikvahiae</i> |
| S1-Single layer longline platform |              |          |                     |                     |
| Fossil resource scarcity          | 1.51E-05     | 1.22E-05 | 6.41E-07            | 2.70E-06            |
| Freshwater ecotoxicity            | 2.19E-03     | 1.77E-03 | 5.91E-06            | 2.49E-05            |
| Freshwater eutrophication         | 3.14E-05     | 2.54E-05 | 1.61E-07            | 6.79E-07            |
| Global warming                    | 1.44E-05     | 1.17E-05 | 8.50E-07            | 3.58E-06            |
| Human carcinogenic toxicity       | 2.46E-03     | 1.99E-03 | 1.87E-05            | 7.89E-05            |
| Human non-carcinogenic toxicity   | 3.80E-04     | 3.00E-04 | 2.16E-06            | 9.10E-06            |
| Marine ecotoxicity                | 3.57E-03     | 2.89E-03 | 1.05E-05            | 4.41E-05            |
| Marine eutrophication             | 5.70E-06     | 4.61E-06 | -5.03E-03           | -7.49E-03           |
| Terrestrial ecotoxicity           | 1.90E-04     | 1.60E-04 | 2.21E-06            | 9.32E-06            |
| S2-Dual layer longline platform   |              |          |                     |                     |
| Fossil resource scarcity          | 1.02E-05     | 8.23E-06 | 8.57E-07            | 3.61E-06            |
| Freshwater ecotoxicity            | 1.47E-03     | 1.19E-03 | 7.89E-06            | 3.33E-05            |
| Freshwater eutrophication         | 2.11E-05     | 1.71E-05 | 2.15E-07            | 9.08E-07            |
| Global warming                    | 1.03E-05     | 8.31E-06 | 1.13E-06            | 4.78E-06            |
| Human carcinogenic toxicity       | 1.65E-03     | 1.34E-03 | 2.50E-05            | 1.10E-04            |
| Human non-carcinogenic toxicity   | 2.50E-04     | 2.10E-04 | 2.88E-06            | 1.21E-05            |
| Marine ecotoxicity                | 2.40E-03     | 1.94E-03 | 1.40E-05            | 5.89E-05            |
| Marine eutrophication             | 3.84E-06     | 3.10E-06 | -5.03E-03           | -7.49E-03           |
| Terrestrial ecotoxicity           | 1.30E-04     | 1.10E-04 | 2.95E-06            | 1.24E-05            |
| S3-Single layer strip platform    |              |          |                     |                     |
| Fossil resource scarcity          | 6.90E-06     | 5.57E-06 | 6.45E-07            | 2.72E-06            |
| Freshwater ecotoxicity            | 9.80E-04     | 7.90E-04 | 5.86E-06            | 2.47E-05            |
| Freshwater eutrophication         | 1.42E-05     | 1.15E-05 | 1.62E-07            | 6.84E-07            |
| Global warming                    | 7.60E-06     | 6.14E-06 | 8.36E-07            | 3.52E-06            |
| Human carcinogenic toxicity       | 1.09E-03     | 8.80E-04 | 1.87E-05            | 7.86E-05            |
| Human non-carcinogenic toxicity   | 1.70E-04     | 1.40E-04 | 2.12E-06            | 8.94E-06            |
| Marine ecotoxicity                | 1.60E-03     | 1.29E-03 | 1.04E-05            | 4.37E-05            |

|                                 |          |          |           |           |
|---------------------------------|----------|----------|-----------|-----------|
| Marine eutrophication           | 2.60E-06 | 2.10E-06 | -5.03E-03 | -7.49E-03 |
| Terrestrial ecotoxicity         | 9.48E-05 | 7.66E-05 | 2.16E-06  | 9.09E-06  |
| S4-Dual layer strip platform    |          |          |           |           |
| Fossil resource scarcity        | 4.71E-06 | 3.81E-06 | 8.58E-07  | 3.62E-06  |
| Freshwater ecotoxicity          | 6.60E-04 | 5.40E-04 | 7.68E-06  | 3.24E-05  |
| Freshwater eutrophication       | 9.65E-06 | 7.80E-06 | 2.16E-07  | 9.09E-07  |
| Global warming                  | 5.73E-06 | 4.63E-06 | 1.09E-06  | 4.58E-06  |
| Human carcinogenic toxicity     | 7.40E-04 | 6.00E-04 | 2.46E-05  | 1.00E-04  |
| Human non-carcinogenic toxicity | 1.20E-04 | 9.68E-05 | 2.75E-06  | 1.16E-05  |
| Marine ecotoxicity              | 1.09E-03 | 8.80E-04 | 1.36E-05  | 5.72E-05  |
| Marine eutrophication           | 1.77E-06 | 1.43E-06 | -5.03E-03 | -7.49E-03 |
| Terrestrial ecotoxicity         | 6.61E-05 | 5.35E-05 | 2.78E-06  | 1.17E-05  |

Table S8 Comparison of normalized amounts of each environmental impact of one-kilogram dry weight of *S. latissima* and *G. tikvahiae* processing and end-use through scenario P1-P4.

| Impact category                 | P1-Digestate     |                  | P2-Human food    |                  | P3-Seaweed fertilizer |                  | P4-Animal feed   |                  |
|---------------------------------|------------------|------------------|------------------|------------------|-----------------------|------------------|------------------|------------------|
|                                 | <i>S.</i>        | <i>G.</i>        | <i>S.</i>        | <i>G.</i>        | <i>S.</i>             | <i>G.</i>        | <i>S.</i>        | <i>G.</i>        |
|                                 | <i>latissima</i> | <i>Tikvahiae</i> | <i>latissima</i> | <i>Tikvahiae</i> | <i>latissima</i>      | <i>Tikvahiae</i> | <i>latissima</i> | <i>Tikvahiae</i> |
| Fossil resource scarcity        | -3.60E-05        | -5.25E-05        | 6.90E-04         | 9.80E-04         | 9.60E-04              | 1.33E-03         | 9.90E-04         | 1.38E-03         |
| Freshwater ecotoxicity          | -2.65E-03        | -3.61E-03        | -3.71E-03        | -3.74E-03        | 1.05E-02              | 1.46E-02         | 1.30E-02         | 1.82E-02         |
| Freshwater eutrophication       | -2.88E-05        | -3.91E-05        | -1.00E-04        | -1.10E-04        | 1.90E-04              | 2.60E-04         | 2.10E-04         | 2.90E-04         |
| Global warming                  | -3.19E-05        | -3.91E-05        | 1.70E-04         | 2.50E-04         | 2.80E-04              | 3.90E-04         | 2.80E-04         | 4.00E-04         |
| Human carcinogenic toxicity     | -9.70E-04        | -1.31E-03        | 1.92E-02         | 2.75E-02         | 2.67E-02              | 3.72E-02         | 2.75E-02         | 3.83E-02         |
| Human non-carcinogenic toxicity | -6.10E-04        | -8.00E-04        | -4.89E-03        | -6.23E-03        | 1.33E-03              | 1.88E-03         | 1.88E-03         | 2.63E-03         |
| Marine ecotoxicity              | -4.76E-03        | -6.54E-03        | -5.77E-03        | -5.76E-03        | 1.62E-02              | 2.27E-02         | 2.08E-02         | 2.90E-02         |
| Marine eutrophication           | -5.28E-06        | -7.79E-06        | -4.50E-04        | -5.90E-04        | 1.41E-05              | 1.92E-05         | 1.93E-05         | 2.69E-05         |
| Terrestrial ecotoxicity         | -8.10E-04        | -1.17E-03        | -1.14E-03        | -1.40E-03        | 2.50E-04              | 2.70E-04         | 9.70E-04         | 1.36E-03         |



Table S9 List of matched processes in the life cycle inventory database

| Material or energy               | Inventory detail                                                                    | Database      |
|----------------------------------|-------------------------------------------------------------------------------------|---------------|
| Inputs                           |                                                                                     |               |
| Aluminum                         | metal working, average for aluminium product manufacturing, alloc. default, S       | Ecoinvent 3.7 |
| Chemicals, inorganic             | market for chemicals, inorganic, alloc. default, S-GLO                              | Ecoinvent 3.7 |
| Chemicals, organic               | market for chemical, organic, alloc. default, S-GLO                                 | Ecoinvent 3.7 |
| Concrete block                   | concrete block production, alloc. default, S-DE                                     | Ecoinvent 3.7 |
| De-ionised water                 | De-ionised water, production mix, at plant, reverse osmosis, from surface water-RER | USLCI         |
| Drying                           | drying of maize grain, alloc. default, S-Quebec                                     | Ecoinvent 3.7 |
| Electricity                      | Electricity, Eastern US, 2014                                                       | USLCI         |
| Gasoline                         | Gasoline, combusted in equipment-RNA                                                | USLCI         |
| Grinding                         | Grinding-RNA                                                                        | Ecoinvent 3.7 |
| Nylon                            | nylon 6-6 production, alloc. default, S-RER                                         | Ecoinvent 3.7 |
| Occupation, sea and ocean        | Resource/in water                                                                   | USLCI         |
| Rigid polypropylene              | Thermoforming, rigid polypropylene part, at plant-RNA                               | USLCI         |
| Polyethylene terephthalate       | Polyethylene terephthalate (PET) virgin resin, at plant, kg-RNA                     | USLCI         |
| PVC                              | Polyvinyl chloride, resin, at plant-RNA                                             | USLCI         |
| Steel                            | Steel, cold-formed studs and track, at plant-RNA                                    | USLCI         |
| Transportation                   | Transport, combination truck, long-haul, diesel powered, Northeast                  | USLCI         |
| Avoided products                 |                                                                                     |               |
| Diammonium phosphate             | diammonium phosphate production, alloc. default, S-RER                              | Ecoinvent 3.7 |
| Electricity                      | Electricity, at Grid, US, 2010                                                      | USLCI         |
| Fishmeal                         | fishmeal; indirect steam dried press cake; at plant; moisture content 5-10%         | USLCI         |
| Lettuce                          | lettuce361 production, alloc. default, S-GLO                                        | Ecoinvent 3.7 |
| Urea ammonium nitrate production | urea ammonium nitrate production, alloc. default, S-RER                             | Ecoinvent 3.7 |

Table S10 List of website address of online resources (websites were visited in April 2021)

| Item                                   | Website address                                                                                                                                                                                                                                                                                                                 |
|----------------------------------------|---------------------------------------------------------------------------------------------------------------------------------------------------------------------------------------------------------------------------------------------------------------------------------------------------------------------------------|
| Spool - 2 inch PVC Tube                | <a href="https://www.homedepot.com/p/JM-EAGLE-2-in-x-10-ft-280-PSI-Schedule-40-PVC-DWV-Plain-End-Pipe-531137/100161954">https://www.homedepot.com/p/JM-EAGLE-2-in-x-10-ft-280-PSI-Schedule-40-PVC-DWV-Plain-End-Pipe-531137/100161954</a>                                                                                       |
| Settling tube - 4 inch PVC Tube        | <a href="https://www.homedepot.com/p/JM-EAGLE-4-in-x-10-ft-220-PSI-PVC-Sch-40-DWV-Plain-End-Pipe-531103/100156409">https://www.homedepot.com/p/JM-EAGLE-4-in-x-10-ft-220-PSI-PVC-Sch-40-DWV-Plain-End-Pipe-531103/100156409</a>                                                                                                 |
| Settling tube cap - 4 inch PVC End Cap | <a href="https://www.homedepot.com/p/NDS-4-in-PVC-Sewer-and-Drain-Cap-4P06/100172701">https://www.homedepot.com/p/NDS-4-in-PVC-Sewer-and-Drain-Cap-4P06/100172701</a>                                                                                                                                                           |
| Settling tube - PVC primer & glue      | <a href="https://www.amazon.com/Oatey-30246-Regular-Cement-4-Ounce/dp/B0002YU23O">https://www.amazon.com/Oatey-30246-Regular-Cement-4-Ounce/dp/B0002YU23O</a>                                                                                                                                                                   |
| Seeding line                           | <a href="https://www.amazon.com/SGT-KNOTS-Twisted-Strength-Versatile/dp/B00XBFARBI?ref_=ast_sto_dp&amp;th=1">https://www.amazon.com/SGT-KNOTS-Twisted-Strength-Versatile/dp/B00XBFARBI?ref_=ast_sto_dp&amp;th=1</a>                                                                                                             |
| F/2 media                              | <a href="https://pentairaes.com/proline-f-2-algae-food.html">https://pentairaes.com/proline-f-2-algae-food.html</a>                                                                                                                                                                                                             |
| Nursery labor cost                     | <a href="https://www.indeed.com/jobs?q=lobster+maine&amp;l=">https://www.indeed.com/jobs?q=lobster+maine&amp;l=</a>                                                                                                                                                                                                             |
| Anchor block                           | <a href="http://gravesconcrete.com/precast-block/">http://gravesconcrete.com/precast-block/</a>                                                                                                                                                                                                                                 |
| Anchor chain                           | <a href="https://shop.hamiltonmarine.com/products/chain-g-30-sc-1-00-1--mooring-chain--60--drum--37849.html">https://shop.hamiltonmarine.com/products/chain-g-30-sc-1-00-1--mooring-chain--60--drum--37849.html</a>                                                                                                             |
| Anchor buoy                            | <a href="https://www.westmarine.com/buy/taylor-made--sur-moor-taper-buoy--P005_154_003_500?recordNum=32">https://www.westmarine.com/buy/taylor-made--sur-moor-taper-buoy--P005_154_003_500?recordNum=32</a>                                                                                                                     |
| Longline and control lines             | <a href="https://www.westmarine.com/buy/new-england-ropes--classic-spun-three-strand-polyester-line-sold-by-the-foot--P002_071_004_004">https://www.westmarine.com/buy/new-england-ropes--classic-spun-three-strand-polyester-line-sold-by-the-foot--P002_071_004_004</a>                                                       |
| Small buoy                             | <a href="https://www.amazon.com/attwood-9350-4-Anchor-Buoy/dp/B00HOHAXDG?ref_=fscpl_pl_dp_2">https://www.amazon.com/attwood-9350-4-Anchor-Buoy/dp/B00HOHAXDG?ref_=fscpl_pl_dp_2</a>                                                                                                                                             |
| Drop line                              | <a href="https://www.westmarine.com/buy/new-england-ropes--classic-spun-three-strand-polyester-line-sold-by-the-foot--P002_071_004_004">https://www.westmarine.com/buy/new-england-ropes--classic-spun-three-strand-polyester-line-sold-by-the-foot--P002_071_004_004</a>                                                       |
| Strengtheners - 1" PVC                 | <a href="https://www.homedepot.com/p/1-in-x-10-ft-PVC-Schedule-40-Plain-End-Pipe-531194/202280936">https://www.homedepot.com/p/1-in-x-10-ft-PVC-Schedule-40-Plain-End-Pipe-531194/202280936</a>                                                                                                                                 |
| Line weight                            | <a href="https://fagenstrom.co/products/block.html">https://fagenstrom.co/products/block.html</a>                                                                                                                                                                                                                               |
| Bucket                                 | <a href="https://www.homedepot.com/p/Leaktite-5-gal-70mil-Food-Safe-Bucket-White-005GFSWH020/300197644">https://www.homedepot.com/p/Leaktite-5-gal-70mil-Food-Safe-Bucket-White-005GFSWH020/300197644</a>                                                                                                                       |
| Gasoline                               | <a href="https://www.eia.gov/dnav/pet/hist/LeafHandler.ashx?n=p&amp;s=emd_epd2d_pte_nus_dpg&amp;f=a">https://www.eia.gov/dnav/pet/hist/LeafHandler.ashx?n=p&amp;s=emd_epd2d_pte_nus_dpg&amp;f=a</a>                                                                                                                             |
| Crane barge rental                     | <a href="http://dbrinc.org/EquipmentRates.html">http://dbrinc.org/EquipmentRates.html</a>                                                                                                                                                                                                                                       |
| Seaweed farm labor cost                | <a href="https://www.maine.gov/labor/labor_laws/minwagehistory.html">https://www.maine.gov/labor/labor_laws/minwagehistory.html</a>                                                                                                                                                                                             |
| Barge                                  | <a href="https://yachts360.com/how-much-does-a-fishing-boat-cost/">https://yachts360.com/how-much-does-a-fishing-boat-cost/</a>                                                                                                                                                                                                 |
| Hammermill                             | <a href="https://www.alibaba.com/product-detail/corn-rice-husk-hammer-mill-also_1600067326470.html?spm=a2700.galleryofferlist.normal_offer.d_title.305e3b02JL6spZ">https://www.alibaba.com/product-detail/corn-rice-husk-hammer-mill-also_1600067326470.html?spm=a2700.galleryofferlist.normal_offer.d_title.305e3b02JL6spZ</a> |
| Drying machine                         | <a href="https://www.alibaba.com/showroom/small-grain-dryer.html">https://www.alibaba.com/showroom/small-grain-dryer.html</a>                                                                                                                                                                                                   |

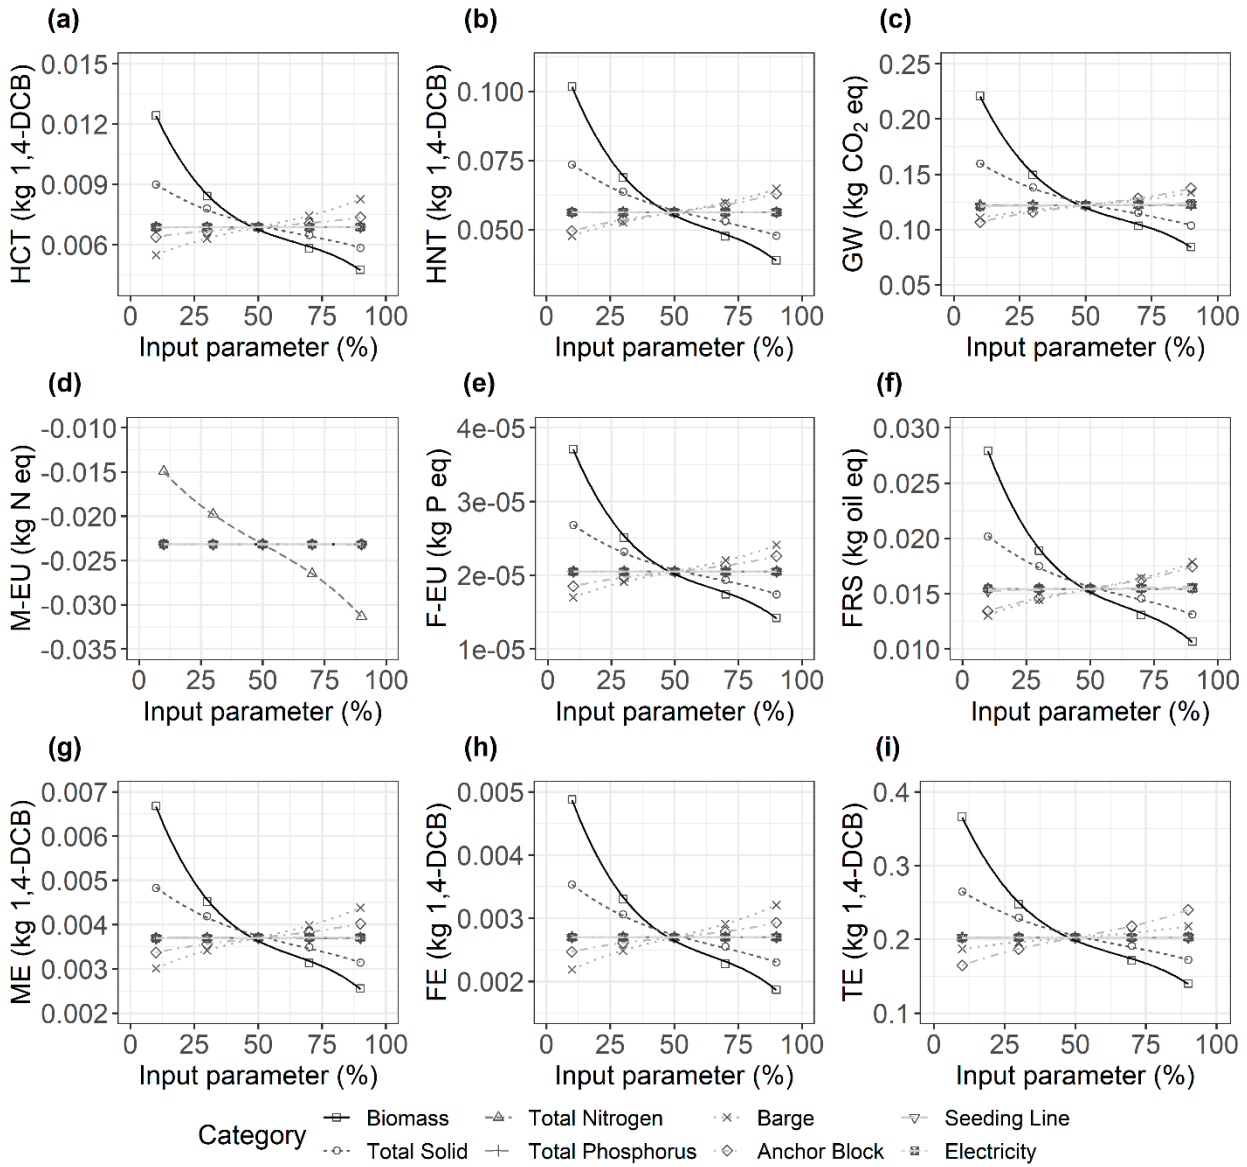

Figure S1 Sensitivity analysis of the LCA for *S. latissima* cultivation strategy C1 and cultivation platform S1. A triangle distribution was applied on each parameter with min, max, and mode values. The x-axis indicates percentile of the input value in the probability distribution. The 50 percentile values were the values used in the LCA. Only parameters with greater than 1% influence are plotted for each impact category. (a) Human carcinogenic toxicity; (b) human non-carcinogenic toxicity; (c) global warming potential; (d) marine eutrophication; (e) freshwater eutrophication; (f) fossil resource scarcity; (g) marine ecotoxicity; (h) freshwater ecotoxicity; (i) terrestrial ecotoxicity

SI. Equations used for estimation of annual project cost:

$$\text{annual project cost} = \text{ammortization cost} + \text{O\&M cost} \quad \text{Eq. (S1)}$$

---


$$amortization\ cost = \left( \frac{R}{(1 + R)^{LP} - 1} + R \right) + cost \quad \text{Eq. (S2)}$$

Where: R = interest rate as a fraction; LP = lifespan of the project; cost = initial cost + replacement costs – salvage value

$$replacement\ cost = initial\ cost \left( \frac{1}{(1 + R)^{RS}} + \frac{1}{(1 + R)^{2RS}} + \cdots + \frac{1}{(1 + R)^{N(RS)}} \right) \quad \text{Eq. (S3)}$$

$$salvage\ cost = initial\ cost \left( \frac{RS + N(RS) - LP}{RS} \right) \quad \text{Eq. (S4)}$$

Where: N = number of times it is replaced = LP/RS (rounded to an integer); RS = replacement schedule in years.

---

## SI. List of acronyms

AD: anaerobic digester

CHP: combined heat and power

DW: dry weight

FW: fresh weight

LCA: life cycle assessment

LCI: life cycle inventory

LCIA: life cycle impact assessment

O&M: operation and maintenance

USLCI: U.S. Life Cycle Inventory Database

TEA: techno-economic analysis

VS: volatile solids

M-EU: marine eutrophication

F-EU: freshwater eutrophication

GW: global warming

HCT: human carcinogenic toxicity

HNT: human non-carcinogenic toxicity

ME: marine ecotoxicity

FE: freshwater ecotoxicity

TE: terrestrial ecotoxicity

## References

- Allen, E.; Wall, D.M.; Herrmann, C.; Xia, A.; Murphy, J.D. What Is the Gross Energy Yield of Third Generation Gaseous Biofuel Sourced from Seaweed? *Energy* **2015**, *81*, 352–360, doi:10.1016/j.energy.2014.12.048.
- Augyte, S.; Yarish, C.; Redmond, S.; Kim, J.K. Cultivation of a Morphologically Distinct Strain of the Sugar Kelp, *Saccharina Latissima* Forma *Angustissima*, from Coastal Maine, USA, with Implications for Ecosystem Services. *J Appl Phycol* **2017**, *29*, 1967–1976, doi:10.1007/s10811-017-1102-x.
- Bak, U.G.; Nielsen, C.W.; Marinho, G.S.; Gregersen, Ó.; Jónsdóttir, R.; Holdt, S.L. The Seasonal Variation in Nitrogen, Amino Acid, Protein and Nitrogen-to-Protein Conversion Factors of Commercially Cultivated Faroese *Saccharina Latissima*. *Algal Res* **2019**, *42*, 101576, doi:10.1016/j.algal.2019.101576.
- Broch, Ø. J.; Ellingsen, I.H.; Forbord, S.; Wang, X.; Volent, Z.; Alver, M.Ø.; Handå, A.; Andresen, K.; Slagstad, D.; Reitan, K.I.; et al. Modelling the Cultivation and Bioremediation Potential of the Kelp *Saccharina Latissima* in Close Proximity to an Exposed Salmon Farm in Norway. *Aquac Environ Interact* **2013**, *4*, 187–206, doi:10.3354/aei00080.
- Freitas, J.R.C.; Salinas Morrondo, J.M.; Cremades Ugarte, J. *Saccharina Latissima* (Laminariales, Øchrophyta) Farming in an Industrial IMTA System in Galicia (Spain). *J Appl Phycol* **2016**, *28*, 377–385, doi:10.1007/s10811-015-0526-4.
- Gorman, L.; Kraemer, G.P.; Yarish, C.; Boo, S.M.; Kim, J.K. The Effects of Temperature on the Growth Rate and Nitrogen Content of Invasive *Gracilaria Vermiculophylla* and Native *Gracilaria Tikvahiae* from Long Island Sound, USA. *Algae* **2017**, *32*, 57–66, doi:10.4490/algae.2017.32.1.30.
- Habig, C.; DeBusk, T.A.; Ryther, J.H. The Effect of Nitrogen Content on Methane Production by the Marine Algae *Gracilaria Tikvahiae* and *Ulva* Sp. *Biomass* **1984**, *4*, 239–251, doi:10.1016/0144-4565(84)90037-4.
- Habig, C.; Andrews, D.A.; Ryther, J.H. Nitrogen Recycling and Methane Production Using *Gracilaria Tikvahiae*: A Closed System Approach. *Resources and Conservation* **1984**, *10*, 303–313, doi:10.1016/0166-3097(84)90023-3.
- Horrocks, J.L.; Stewart, G.R.; Dennison, W.C. Tissue Nutrient Content of *Gracilaria* Spp. (Rhodophyta) and Water Quality along an Estuarine Gradient. *Mar Freshw Res* **1995**, *46*, 975–983, doi:10.1071/MF9950975.
- Jard, G.; Jackowiak, D.; Carrère, H.; Delgenes, J.P.; Torrijos, M.; Steyer, J.P.; Dumas, C. Batch and Semi-Continuous Anaerobic Digestion of *Palmaria Palmata*: Comparison with *Saccharina Latissima* and Inhibition Studies. *Chemical Engineering Journal* **2012**, *209*, 513–519, doi:10.1016/j.cej.2012.08.010.
- Johnson, R.B.; Kim, J.K.; Armbruster, L.C.; Yarish, C. Nitrogen Allocation of *Gracilaria Tikvahiae* Grown in Urbanized Estuaries of Long Island Sound and New York City, USA: A Preliminary Evaluation of Øcean Farmed *Gracilaria* for Alternative Fish Feeds. *Algae* **2014**, *29*, 227–235.
- Kim, J.K.; Kraemer, G.P.; Yarish, C. Field Scale Evaluation of Seaweed Aquaculture as a Nutrient Bioextraction Strategy in Long Island Sound and the Bronx River Estuary. *Aquaculture* **2014**, *433*, 148–156, doi:10.1016/j.aquaculture.2014.05.034.
- Langlois, J.; Sassi, J.F.; Jard, G.; Steyer, J.P.; Delgenes, J.P.; Hélias, A. Life Cycle Assessment of Biomethane from Øffshore-Cultivated Seaweed. *Biofuels, Bioproducts and Biorefining* **2012**, *6*, 387–404, doi:10.1002/bbb.1330.
- Lapointe, B.E.; Ryther, J.H. Some Aspects of the Growth and Yield of *Gracilaria Tikvahiae* in Culture. *Aquaculture* **1978**, *15*, 185–193, doi:10.1016/0044-8486(78)90030-3.
- Pechsiri, J.S.; Thomas, J.B.E.; Risén, E.; Ribeiro, M.S.; Malmström, M.E.; Nylund, G.M.; Jansson, A.; Welander, U.; Pavia, H.; Gröndahl, F. Energy Performance and Greenhouse Gas Emissions of Kelp Cultivation for Biogas and Fertilizer Recovery in Sweden. *Science of the Total Environment* **2016**, *573*, 347–355, doi:10.1016/j.scitotenv.2016.07.220.
- Peteiro, C.; Freire, Ó. Biomass Yield and Morphological Features of the Seaweed *Saccharina Latissima* Cultivated at Two Different Sites in a Coastal Bay in the Atlantic Coast of Spain. *J Appl Phycol* **2013**, *25*, 205–213, doi:10.1007/s10811-012-9854-9.
- Reid, G.K.; Chopin, T.; Robinson, S.M.C.; Azevedo, P.; Quinton, M.; Belyea, E. Weight Ratios of the Kelps, *Alaria Esculenta* and *Saccharina Latissima*, Required to Sequester Dissolved Inorganic Nutrients and Supply Øxygen for Atlantic Salmon, *Salmo Salar*, in Integrated Multi-Trophic Aquaculture Systems. *Aquaculture* **2013**, *408–409*, 34–46, doi:10.1016/j.aquaculture.2013.05.004.
- Samocha, T.M.; Fricker, J.; Ali, A.M.; Shpigel, M.; Neori, A. Growth and Nutrient Uptake of the Macroalga *Gracilaria Tikvahiae* Cultured with the Shrimp *Litopenaeus Vannamei* in an Integrated Multi-Trophic Aquaculture (IMTA) System. *Aquaculture* **2015**, *446*, 263–271, doi:10.1016/j.aquaculture.2015.05.008.
- Schiener, P.; Atack, T.; Wareing, R.A.; Kelly, M.S.; Hughes, A.D. The By-Products from Marine Biofuels as a Feed Source for the Aquaculture Industry: A Novel Example of the Biorefinery Approach. *Biomass Convers Biorefin* **2016**, *6*, 281–287, doi:10.1007/s13399-015-0190-6.
- Scoggan, J.; Zhimeng, Z. Culture of Kelp (*Laminaria Japonica*) in China. *Training Manual* **1989**.
- Seghetta, M.; Tørring, D.; Bruhn, A.; Thomsen, M. Bioextraction Potential of Seaweed in Denmark - An Instrument for Circular Nutrient Management. *Science of the Total Environment* **2016**, *563–564*, 513–529, doi:10.1016/j.scitotenv.2016.04.010.
- Taelman, S.E.; Champenois, J.; Edwards, M.D.; De Meester, S.; Dewulf, J. Comparative Environmental Life Cycle Assessment of Two Seaweed Cultivation Systems in North West Europe with a Focus on Quantifying Sea Surface Øccupation. *Algal Res* **2015**, *11*, 173–183, doi:10.1016/j.algal.2015.06.018.
- van Øirschot, R.; Thomas, J.B.E.; Gröndahl, F.; Fortuin, K.P.J.; Brandenburg, W.; Potting, J. Explorative Environmental Life Cycle Assessment for System Design of Seaweed Cultivation and Drying. *Algal Res* **2017**, *27*, 43–54, doi:10.1016/j.algal.2017.07.025.
- Vivekanand, V.; Eijssink, V.G.H.; Horn, S.J. Biogas Production from the Brown Seaweed *Saccharina Latissima*: Thermal Pretreatment and Codigestion with Wheat Straw. *J Appl Phycol* **2012**, *24*, 1295–1301, doi:10.1007/s10811-011-9779-8.

- 
25. Wang, X.; Broch, Ø. J.; Forbord, S.; Handå, A.; Skjermo, J.; Reitan, K.I.; Vadstein, Ø.; Lsen, Y. Assimilation of Inorganic Nutrients from Salmon (*Salmo Salar*) Farming by the Macroalgae (*Saccharina Latissima*) in an Exposed Coastal Environment: Implications for Integrated Multi-Trophic Aquaculture. *J Appl Phycol* **2014**, *26*, 1869–1878, doi:10.1007/s10811-013-0230-1.
